# Supplementary material
Source: publisher figshare collection journal article supplement (https://karger.figshare.com/ndownloader/files/17796617)
Supplement: Supplementary file 1 [file 17796617]

## Sheet: Figure
		95% CI LL	95% CI UL	LL Error Bars	UL Error Bars
Q1 (≤4.5)	1	0	0
Q2 (4.6-5.4)	1.41	0.92	2.14	0.49	0.73
Q3 (5.5-6.5)	1.72	1.07	2.75	0.65	1.03
Q4 (≥6.5)	2.23	1.48	3.36	0.75	1.13
